# Supplementary material for: Acute responses and recovery in the femoral cartilage morphology following running and cool-down protocols
Source: PeerJ. 2024 Oct 24;12:e18302. doi: 10.7717/peerj.18302 (PMC11512796; doi:10.7717/peerj.18302)
Supplement: Supplemental Information 1 [file peerj-12-18302-s001.xlsx]

## Sheet: data1
subject	condition	time	lateral_thickness (mm)	medial_thickness (mm)	intercondylar_thickness (mm)	BF (ml/min)
1	1	0	1.936	1.77033	2.161	32.17
1	1	1	2.00633	1.75267	2.064	25.76
1	1	2	2.06933	1.79433	2.16067	28.44
1	1	3	2.06567	1.85767	2.179	24.04
1	1	4	1.918	1.92633	2.17333	16.66
1	1	5	1.99267	1.764	2.216	26.29
1	1	6	1.96333	1.66467	2.14067	14.22
1	1	7	1.8	1.622	1.885	44.12
1	1	8	1.73433	1.63667	1.82567	29.71
1	1	9	1.722	1.681	2.071	20.82
1	1	10	1.73767	1.86833	2.12433	15.86
1	1	11	1.90067	1.92833	2.24067	12.75
1	1	12	2.00133	1.83667	2.19367	19.68
1	1	13	1.88133	1.833	2.181	40.65
1	1	14	2.013	1.83267	2.17167	25.85
1	1	15	1.86367	1.818	2.20667	30.7
1	2	0	1.81867	1.76633	2.042	15.48
1	2	1	1.82267	1.76133	2.02867	28.03
1	2	2	1.82933	1.82133	1.943	40.23
1	2	3	1.81633	1.8	1.99633	21.46
1	2	4	1.84833	1.78	2.07833	15.85
1	2	5	1.79633	1.76067	2.11233	15.38
1	2	6	1.843	1.839	2.086	17.42
1	2	7	1.66167	1.79533	1.868	40.08
1	2	8	1.86733	1.68967	1.858	79.16
1	2	9	1.76567	1.72	1.91133	15.41
1	2	10	1.80367	1.64233	2.03967	23.48
1	2	11	1.906	1.89233	1.899	23.88
1	2	12	1.94367	1.80833	2.005	15.08
1	2	13	1.866	1.72367	2.01867	16.95
1	2	14	1.951	1.83067	2.00167	14.81
1	2	15	1.85767	1.78333	2.09867	16.27
1	3	0	1.847	1.75167	2.154	19.42
1	3	1	1.803	1.69167	2.13333	15.16
1	3	2	1.88233	1.77333	2.023	18.24
1	3	3	1.827	1.75733	1.95467	15.9
1	3	4	1.82433	1.81667	2.13633	14.04
1	3	5	1.79133	1.80933	2.14767	8.61
1	3	6	1.81567	1.76133	1.96767	15.75
1	3	7	1.62133	1.63567	1.79267	59.9
1	3	8	1.82233	1.72433	1.869	30.12
1	3	9	1.74233	1.821	1.94767	18.94
1	3	10	1.803	1.72833	2.15967	20.38
1	3	11	1.75933	1.80567	2.06	31.18
1	3	12	1.74333	1.775	1.85233	21.5
1	3	13	1.80433	1.76333	2.07767	19.8
1	3	14	1.756	1.72767	2.073	20.66
1	3	15	1.80833	1.798	2.14267	21.26
2	1	0	2.12833	1.701	2.26133	17.7
2	1	1	2.353	1.75567	2.13067	11.74
2	1	2	2.35567	1.67567	2.07	14.46
2	1	3	2.12233	1.808	2.30933	11.85
2	1	4	2.122	1.74467	2.323	16.18
2	1	5	2.12233	1.814	2.26233	17.93
2	1	6	2.05867	1.77233	2.19567	31.16
2	1	7	1.96633	1.32667	1.791	64.38
2	1	8	1.784	1.46533	2.43767	21.61
2	1	9	1.73633	1.67033	1.81433	13.51
2	1	10	1.915	1.68667	1.92767	13.31
2	1	11	1.81633	1.78467	2.08233	11.78
2	1	12	2.01333	1.834	2.117	14.42
2	1	13	2.022	1.776	2.164	12.27
2	1	14	2.02667	1.788	2.18033	15.15
2	1	15	2.13833	1.69667	2.27067	15.15
2	2	0	2.04333	1.991	2.33767	20.77
2	2	1	2.116	1.73133	2.13633	20.4
2	2	2	2.13133	1.789	1.99133	24.43
2	2	3	1.94333	1.77067	2.302	21.28
2	2	4	1.76367	1.797	2.283	13.75
2	2	5	1.904	1.808	2.208	16.13
2	2	6	2.03333	1.82767	2.15567	28.54
2	2	7	1.773	1.50067	1.887	46.16
2	2	8	1.66133	1.43567	1.89833	29.07
2	2	9	1.87267	1.59733	2.06767	31.4
2	2	10	1.84433	1.74033	2.13533	19.07
2	2	11	1.99167	1.763	2.12667	19.25
2	2	12	1.98433	1.69333	2.16467	13.28
2	2	13	1.98633	1.831	2.161	14.05
2	2	14	1.938	1.91233	2.259	17.78
2	2	15	1.88667	1.77733	2.17167	15.49
2	3	0	1.987	1.83667	2.16967	12.99
2	3	1	1.96167	1.90867	2.10433	20.77
2	3	2	1.99567	1.932	2.10367	20.51
2	3	3	2.02667	1.85967	2.14233	15.8
2	3	4	1.97033	1.814	2.12733	14.78
2	3	5	2.01733	1.898	2.16567	16.6
2	3	6	2.03333	1.905	2.13733	21.29
2	3	7	1.72733	1.42233	1.8095	85.69
2	3	8	1.73433	1.55767	1.87167	22.82
2	3	9	1.71633	1.773	1.877	22.23
2	3	10	1.91633	1.79867	2.02067	17.04
2	3	11	2.01867	1.81233	2.12367	22.04
2	3	12	1.98633	1.69267	2.18833	20.43
2	3	13	1.904	1.72867	2.07433	20.86
2	3	14	2.036	1.884	2.17067	18.71
2	3	15	2.016	1.88067	2.165	25.71
3	1	0	2.308	2.676	2.743	23.12
3	1	1	2.34667	2.29	2.23967	21.07
3	1	2	2.267	2.444	2.69333	13.08
3	1	3	2.69333	2.25133	2.24	11.83
3	1	4	2.42567	2.11133	2.55233	14.27
3	1	5	2.32467	2.16367	2.882	15.54
3	1	6	2.29333	2.03633	2.56967	23.22
3	1	7	2.21333	2.337	2.53467	43.43
3	1	8	2.33767	2.656	2.36467	9.11
3	1	9	2.26567	2.604	2.27167	9.51
3	1	10	2.25867	2.322	2.36933	15.86
3	1	11	2.32567	2.22967	2.5	15.21
3	1	12	2.29033	2.01167	2.43067	10.62
3	1	13	2.39333	2.292	2.58667	12.72
3	1	14	2.388	2.37867	2.604	12.29
3	1	15	2.33467	2.29967	2.63933	12.65
3	2	0	2.16067	2.09867	2.46067	13.43
3	2	1	2.18767	2.09633	2.49067	13.98
3	2	2	2.23	2.05267	2.316	15.6
3	2	3	2.25933	2.00967	2.391	8.2
3	2	4	2.216	2.01133	2.43667	9.79
3	2	5	2.269	2.088	2.43967	8.23
3	2	6	2.23333	2.02367	2.35467	8.41
3	2	7	1.96633	2.024	2.13967	65.5
3	2	8	1.85167	1.92967	2.18133	40.57
3	2	9	1.968	1.99433	2.21567	26.72
3	2	10	2.09233	1.93367	2.228	9.14
3	2	11	2.19033	2.018	2.181	8.56
3	2	12	2.20033	2.044	2.312	18.17
3	2	13	2.13533	2.00833	2.316	12.38
3	2	14	2.185	2.05533	2.37933	13.59
3	2	15	2.209	2.08567	2.361	8.69
3	3	0	2.096	1.83467	2.18633	14.49
3	3	1	2.205	1.86467	2.143	12.85
3	3	2	2.30467	2.13033	2.42433	14.43
3	3	3	2.30967	1.994	2.74907	14.87
3	3	4	1.98967	1.89967	2.10333	14.51
3	3	5	2.26933	1.89367	2.29467	10.22
3	3	6	2.085	1.983	2.489	11.32
3	3	7	1.85067	1.71533	2.04	30.22
3	3	8	1.891	1.54033	1.95567	18.15
3	3	9	1.965	1.92033	2.091	15.01
3	3	10	1.99367	2.04267	2.141	18.25
3	3	11	2.146	1.88267	2.48167	17.97
3	3	12	2.38867	1.85733	2.31667	15.94
3	3	13	2.045	2.049	2.245	17.7
3	3	14	2.228	1.909	2.56867	14.64
3	3	15	2.131	1.96133	2.33767	12.23
4	1	0	1.83533	1.52933	1.959	11.75
4	1	1	1.94867	1.80733	2.00833	10.46
4	1	2	1.955	1.77633	2.03467	17
4	1	3	1.87067	1.85433	2.02033	11.48
4	1	4	1.988	1.76633	2.05033	14.29
4	1	5	1.966	1.839	2.058	13.26
4	1	6	1.96133	1.77533	2.11867	9.07
4	1	7	1.77633	1.45167	1.886	55.96
4	1	8	1.837	1.70433	1.959	19.61
4	1	9	2.354	1.61167	2.01133	7.74
4	1	10	1.92733	1.675	1.973	8.07
4	1	11	1.93033	1.673	2.066	13.32
4	1	12	1.98733	1.80133	2.12367	12.23
4	1	13	2.02033	1.93567	2.03467	5.05
4	1	14	1.99633	1.94767	2.079	12.67
4	1	15	1.951	1.856	2.04467	12.07
4	2	0	1.969	1.89167	2.07933	21.91
4	2	1	1.94533	1.79267	2.07833	21.94
4	2	2	1.98867	1.864	2.14833	13.71
4	2	3	2.047	1.92433	2.12067	17.05
4	2	4	2.034	1.831	2.204	15.07
4	2	5	2.00067	1.85	2.11467	13.44
4	2	6	2.017	1.82567	2.15267	15.5
4	2	7	1.68	1.60367	1.946	42.1
4	2	8	1.83567	1.70033	1.91233	29.26
4	2	9	1.90033	1.78867	1.982	26.03
4	2	10	2.018	1.85067	2.10167	15.37
4	2	11	1.95367	1.87133	2.183	12.86
4	2	12	1.97933	1.854	2.103	13.4
4	2	13	1.917	1.80667	2.12167	11.28
4	2	14	1.98367	1.75767	2.11733	16.91
4	2	15	2.00467	1.80233	2.141	17.22
4	3	0	1.975	1.79967	2.10167	8.99
4	3	1	1.88667	1.78767	2.06833	16.09
4	3	2	2.00533	1.82367	2.06467	10.88
4	3	3	1.97267	1.846	2.16567	11.62
4	3	4	2.028	1.80167	2.139	11.1
4	3	5	1.879	1.74767	2.08433	12.99
4	3	6	2.02767	1.86733	2.11067	11.57
4	3	7	1.77033	1.58267	1.92033	49.07
4	3	8	1.925	1.696	2.124	15.84
4	3	9	1.811	1.65733	1.99567	14.18
4	3	10	1.92367	1.74	2.06267	17.6
4	3	11	1.968	1.82067	2.09033	8.56
4	3	12	1.99933	1.87567	2.089	9.27
4	3	13	1.92033	1.859	2.06467	16.16
4	3	14	2.067	1.841	2.20267	13.85
4	3	15	1.917	1.88833	2.073	9.82
5	1	0	2.19	1.967	2.19633	11.25
5	1	1	2.12933	2.03167	2.23767	11.97
5	1	2	2.19267	2.08833	2.229	8.49
5	1	3	2.072	2.02833	2.18833	9.07
5	1	4	2.06133	2.03833	2.24633	11.42
5	1	5	1.955	1.99467	2.15133	8.24
5	1	6	1.99	2.00567	2.14	6.61
5	1	7	1.793	1.72967	1.938	34.95
5	1	8	1.892	1.95133	2.00567	5.44
5	1	9	1.949	1.80433	1.98933	7.45
5	1	10	1.938	1.90833	2.04233	5.82
5	1	11	2.02567	1.97233	2.11733	8.69
5	1	12	1.96667	1.9685	2.10633	7.72
5	1	13	2.068	1.98167	2.12	8.78
5	1	14	2.05833	2.00833	2.09833	8.94
5	1	15	2.10133	2.065	2.13033	7.18
5	2	0	2.13633	1.694	2.20733	6.92
5	2	1	2.09567	1.83233	2.206	10.82
5	2	2	2.11367	1.78567	2.194	6.88
5	2	3	2.112	1.813	2.18767	7.03
5	2	4	2.05567	1.94867	2.15467	9.18
5	2	5	2.11267	1.80333	2.2	8.24
5	2	6	2.06633	1.85467	2.17267	6.26
5	2	7	1.751	1.667	1.88533	35.72
5	2	8	1.57667	1.56133	1.844	34.86
5	2	9	1.598	1.60533	1.791	30.36
5	2	10	1.86933	1.63633	1.903	11.82
5	2	11	1.914	1.82933	2.07467	8.88
5	2	12	2.06667	1.83967	2.18733	7.81
5	2	13	2.112	1.82733	2.1	10.09
5	2	14	2.06733	1.76933	2.172	10.89
5	2	15	2.06933	1.78033	2.23133	8.62
5	3	0	2.08233	1.79533	2.203	10.72
5	3	1	2.11433	1.76667	2.244	12.71
5	3	2	2.07667	1.765	2.21033	13.76
5	3	3	2.15967	1.82467	2.213	9.57
5	3	4	2.1	1.71533	2.12667	11.92
5	3	5	2.143	1.815	2.101	10.36
5	3	6	2.11733	1.85367	2.18033	10.72
5	3	7	1.809	1.647	1.83533	37.34
5	3	8	1.76033	1.68467	1.946	20.97
5	3	9	1.71067	1.871	1.91667	9.84
5	3	10	1.93347	1.79267	1.98267	6.26
5	3	11	1.93167	1.821	2.01967	7.77
5	3	12	1.86233	1.73833	2.01267	8.46
5	3	13	2.09833	1.911	2.20233	12.43
5	3	14	2.07733	1.87167	2.12967	8.69
5	3	15	2.10833	1.812	2.167	12
6	1	0	2.28	1.92167	2.316	10.84
6	1	1	2.183	2.07533	2.45267	15.93
6	1	2	2.15833	1.88367	2.289	8.75
6	1	3	2.146	1.85833	2.34967	11.23
6	1	4	2.21067	1.92133	2.29167	16.66
6	1	5	2.193	1.88467	2.27467	20.43
6	1	6	2.201	1.93067	2.28733	11.19
6	1	7	1.954	1.72067	2.074	49.56
6	1	8	1.805	1.68733	1.921	34.17
6	1	9	1.82467	1.75667	1.977	23.46
6	1	10	2.05667	1.90933	2.04333	29.05
6	1	11	2.07967	1.934	2.20567	11.11
6	1	12	2.10567	1.92667	2.22467	13.31
6	1	13	2.10833	1.94433	2.248	13.19
6	1	14	2.11633	1.98367	2.22233	14.17
6	1	15	2.152	1.926	2.22733	10.33
6	2	0	2.23567	1.945	2.392	14.01
6	2	1	2.12567	1.821	2.30233	5.6
6	2	2	2.1	1.96967	2.248	6.53
6	2	3	2.093	1.978	2.35	6.16
6	2	4	2.07567	1.97667	2.25933	7.23
6	2	5	2.08167	1.876	2.358	9.61
6	2	6	2.16767	1.90433	2.29633	7.54
6	2	7	1.97067	1.76333	1.99867	32.48
6	2	8	1.89333	1.793	1.906	26.47
6	2	9	1.94333	1.83933	2.03967	24.94
6	2	10	2.00767	1.87567	2.134	4.7
6	2	11	2.061	1.91933	2.23033	7.97
6	2	12	2.126	1.913	2.36867	8.71
6	2	13	2.05267	1.891	2.372	8.35
6	2	14	2.05767	1.851	2.343	9.32
6	2	15	2.11267	2.06967	2.3	6.02
6	3	0	2.07567	1.933	2.323	16.08
6	3	1	2.09667	2.019	2.24167	7.68
6	3	2	2.12667	2.031	2.39467	10
6	3	3	2.009	1.913	2.34667	8.38
6	3	4	2.02033	1.879	2.20433	11.18
6	3	5	2.14333	1.88633	2.37867	9.83
6	3	6	2.06367	1.58433	2.29033	10.9
6	3	7	1.75967	1.783	1.88533	38.49
6	3	8	1.81567	1.74133	1.934	20.64
6	3	9	1.84467	1.95967	2.14967	12.73
6	3	10	2.016	1.84367	2.23767	15.14
6	3	11	1.936	1.86	2.18233	11.03
6	3	12	2.123	2.04133	2.223	14.42
6	3	13	2.08433	1.97	2.30633	15.62
6	3	14	2.07433	1.99033	2.28567	14.54
6	3	15	2.09433	2.022	2.35067	13.31
7	1	0	2.41267	1.804	2.622	49.74
7	1	1	2.16867	1.872	2.505	41.78
7	1	2	2.178	1.96133	2.39333	92.12
7	1	3	2.09133	1.909	2.365	90.4
7	1	4	2.142	1.9	2.44533	42.4
7	1	5	2.12567	1.933	2.27867	34.23
7	1	6	2.14267	1.834	2.266	15.64
7	1	7	1.84833	1.75233	2.013	155.8
7	1	8	1.93433	1.789	2.05933	60.59
7	1	9	1.93	1.92967	2.18067	23.37
7	1	10	2.02567	1.81633	2.21967	27.46
7	1	11	2.088	1.923	2.22467	33.09
7	1	12	2.09333	1.94133	2.34367	15.49
7	1	13	2.12367	1.89567	2.288	25.18
7	1	14	2.10133	1.74733	2.23633	24.94
7	1	15	2.107	1.78933	2.283	29.08
7	2	0	2.07067	1.90767	2.32567	34.13
7	2	1	2.12167	1.88233	2.23	28.84
7	2	2	2.09067	1.88933	2.38033	38.77
7	2	3	2.11133	1.837	2.346	31.01
7	2	4	2.17667	1.97267	2.34867	17.81
7	2	5	1.97033	1.97633	2.31467	47.3
7	2	6	2.07633	1.89633	2.43433	17.96
7	2	7	1.883	1.77767	2.021	59.29
7	2	8	2.016	1.81933	2.08333	41.74
7	2	9	2.01367	1.799	2.198	31.88
7	2	10	2.14233	1.85833	2.36867	20.17
7	2	11	2.138	1.87233	2.34933	14.23
7	2	12	2.064	1.85967	2.31233	16.33
7	2	13	2.059	1.801	2.317	12.8
7	2	14	1.985	1.832	2.25867	13.48
7	2	15	2.11333	1.88033	2.33433	14.87
7	3	0	2.09233	1.827	2.301	29.34
7	3	1	2.10467	1.85967	2.325	42.77
7	3	2	2.17633	1.846	2.374	48.16
7	3	3	2.083	1.763	2.29567	58.31
7	3	4	2.07033	1.82567	2.313	66.46
7	3	5	2.06067	1.836	2.31633	75.76
7	3	6	2.11533	1.876	2.19367	57.48
7	3	7	1.933	1.72367	2.11967	40.09
7	3	8	1.84067	1.67667	2.03767	22.74
7	3	9	1.83833	1.69733	2.104	20.16
7	3	10	1.999	1.79967	2.20033	71.14
7	3	11	2.11333	1.893	2.30667	53.5
7	3	12	2.07467	1.88733	2.35567	75.76
7	3	13	2.06	1.88567	2.30033	66.8
7	3	14	2.06867	1.869	2.283	71.45
7	3	15	2.04167	1.859	2.27533	42.57
8	1	0	2.09333	1.89067	2.21633	16.68
8	1	1	2.07833	1.789	2.22533	14.46
8	1	2	2.084	1.87133	2.252	14.96
8	1	3	2.08433	1.872	2.301	10.92
8	1	4	2.08567	1.849	2.267	6.1
8	1	5	2.084	1.85467	2.256	14.41
8	1	6	2.04933	1.826	2.33533	17.1
8	1	7	1.83733	1.759	1.93633	31.34
8	1	8	1.93167	1.79633	1.89833	24.3
8	1	9	1.86067	1.852	2.02833	24.59
8	1	10	1.824	1.919	2.19633	36.23
8	1	11	1.79867	1.80067	2.29167	40.04
8	1	12	2.087	1.888	2.15633	31.74
8	1	13	2.09633	1.85067	2.26567	38.73
8	1	14	2.07567	1.89967	2.266	46.34
8	1	15	2.14	1.90467	2.28	46.29
8	2	0	2.04933	1.84167	2.24267	7.57
8	2	1	2.13133	1.88133	2.34233	13.11
8	2	2	2.08967	1.841	2.255	8.48
8	2	3	2.08033	1.872	2.24133	10.16
8	2	4	2.08333	1.89233	2.35	13.33
8	2	5	2.103	1.94167	2.30233	15.39
8	2	6	2.04767	1.85367	2.33933	20.38
8	2	7	2.053	1.844	2.091	36.58
8	2	8	1.85133	1.775	2.057	29.51
8	2	9	1.89267	1.863	2.267	22.84
8	2	10	1.987	1.89067	2.33033	16.04
8	2	11	2.11433	1.90233	2.302	12.24
8	2	12	2.02767	1.975	2.35167	20.72
8	2	13	2.20167	1.83167	2.26867	15.38
8	2	14	2.08967	1.86367	2.28967	14.88
8	2	15	2.10233	1.882	2.34933	7.32
8	3	0	2.11	1.93767	2.36867	8.83
8	3	1	2.10067	1.93767	2.281	8.83
8	3	2	2.02367	1.86267	2.266	8.66
8	3	3	2.05933	1.94633	2.30467	10.04
8	3	4	2.11167	1.809	2.365	16.95
8	3	5	1.996	1.85733	2.298	16.47
8	3	6	2.031	1.83967	2.33267	13.53
8	3	7	1.96033	1.94033	2.03833	97.77
8	3	8	1.80533	1.75733	2.06	23.99
8	3	9	1.97033	1.88467	2.05633	20.04
8	3	10	2.01833	1.81567	2.204	31.94
8	3	11	2.085	1.81633	2.234	23.56
8	3	12	2.103	1.86633	2.26067	23.6
8	3	13	2.11367	1.86067	2.19	18.81
8	3	14	2.07233	1.906	2.21733	11.87
8	3	15	2.124	1.82433	2.34	15.08
9	1	0	1.95433	1.90433	2.209	6.2
9	1	1	2.10967	1.824	2.285	7.76
9	1	2	2.11133	1.82133	2.327	6.56
9	1	3	2.143	1.90033	2.31067	12
9	1	4	2.09633	1.92867	2.297	5.26
9	1	5	2.02067	1.864	2.34433	11
9	1	6	2.06833	1.89067	2.30367	12.62
9	1	7	1.857	1.86767	2.04567	31.08
9	1	8	1.8415	1.69167	1.86783	27.09
9	1	9	1.928	1.74567	1.96533	12.31
9	1	10	1.878	1.86567	1.95933	22.72
9	1	11	1.97267	1.864	2.26433	26.89
9	1	12	1.921	1.79833	2.27067	22.8
9	1	13	2.157	1.89967	2.37633	14.1
9	1	14	2.08233	1.808	2.24367	14.13
9	1	15	2.06867	1.918	2.31633	6.42
9	2	0	2.128	1.91867	2.30067	6.54
9	2	1	2.077	1.804	2.34833	3.37
9	2	2	2.079	1.91533	2.30133	2.98
9	2	3	2.11567	1.84233	2.35567	3.74
9	2	4	2.09567	1.855	2.398	5.1
9	2	5	2.06133	1.858	2.309	3.86
9	2	6	2.104	1.89867	2.30667	2.87
9	2	7	1.74967	1.732	2.117	37.62
9	2	8	1.85533	1.84467	2.08033	34.33
9	2	9	1.78933	1.72333	2.06533	25.32
9	2	10	1.915	1.91733	2.30433	10.2
9	2	11	2.023	1.79867	2.27733	10.4
9	2	12	2.09733	1.973	2.31533	3.51
9	2	13	2.01567	1.931	2.28033	6.62
9	2	14	2.16867	1.88367	2.409	6.26
9	2	15	2.04167	1.848	2.31867	4.96
9	3	0	1.885	1.79267	2.30733	1.94
9	3	1	1.88	1.85533	2.253	1.64
9	3	2	1.94733	1.88733	2.35467	1.89
9	3	3	2.071	1.86033	2.37267	1.63
9	3	4	2.08433	1.83967	2.379	2.56
9	3	5	2.03133	1.82333	2.25633	1.91
9	3	6	2.02067	1.87933	2.35067	3.45
9	3	7	1.86567	1.63533	2.03567	23.58
9	3	8	1.834	1.801	2.01167	22.41
9	3	9	2.07933	1.86367	2.18767	16.74
9	3	10	1.98	1.912	2.34133	20.08
9	3	11	1.90967	1.788	2.284	38.8
9	3	12	2.08	1.85933	2.37067	33.48
9	3	13	2.089	1.95433	2.31333	32.9
9	3	14	2.02	1.91767	2.16133	15.31
9	3	15	2.04767	1.90267	2.398	9.54
10	1	0	2.02187	1.86767	2.344	18.52
10	1	1	2.06433	1.884	2.30167	31.35
10	1	2	2.09467	1.85733	2.33667	25.88
10	1	3	2.106	1.90833	2.34767	26.66
10	1	4	2.051	1.90567	2.30433	22.85
10	1	5	2.05067	1.91733	2.304	24.6
10	1	6	2.034	1.79367	2.32367	9.92
10	1	7	2.06433	1.66867	2.20933	40.87
10	1	8	1.90833	1.80333	1.987	15.93
10	1	9	1.85667	1.817	2.11033	15.55
10	1	10	2.045	1.867	2.27667	35.2
10	1	11	2.04967	1.83667	2.234	52.41
10	1	12	2.10033	1.89	2.34233	23.22
10	1	13	2.109	1.91933	2.382	9.36
10	1	14	2.05667	1.80133	2.413	19.82
10	1	15	1.898	1.866	2.27533	7.53
10	2	0	2.02933	1.901	2.442	4.68
10	2	1	1.97067	1.88833	2.24033	4.8
10	2	2	2.01667	1.893	2.25533	6.82
10	2	3	1.86437	1.94893	2.359	10.32
10	2	4	2.31967	1.83933	2.31633	15.41
10	2	5	2.08167	1.885	2.30813	10.99
10	2	6	2.10733	1.85567	2.32833	11.18
10	2	7	1.83233	1.771	2.09633	24.79
10	2	8	2.073	1.80433	2.07867	27.19
10	2	9	2.023	1.82167	2.233	25.41
10	2	10	1.97233	1.89167	2.206	6.09
10	2	11	2.09333	1.812	2.28867	22.59
10	2	12	2.13767	1.85767	2.24767	10.53
10	2	13	2.01433	1.84233	2.27167	18.63
10	2	14	2.04233	1.92767	2.294	6.33
10	2	15	1.93	1.91533	2.319	9.07
10	3	0	1.93267	1.819	2.34433	10.89
10	3	1	2.03533	1.96533	2.28433	11.85
10	3	2	2.12167	1.91033	2.33333	13.56
10	3	3	2.08233	1.87967	2.29933	10.46
10	3	4	2.00867	1.93467	2.29867	10.57
10	3	5	2.058	1.90433	2.32467	17.54
10	3	6	2.027	1.90967	2.25667	6.72
10	3	7	1.93933	1.913	2.09867	45.88
10	3	8	1.98067	1.92167	2.02	23.17
10	3	9	1.849	1.75967	1.99967	18.66
10	3	10	2.06333	1.79467	2.14867	22.89
10	3	11	2.073	1.853	2.36767	27.59
10	3	12	2.092	1.81433	2.30933	11.57
10	3	13	2.06967	1.786	2.34133	19.04
10	3	14	2.08967	1.871	2.43433	16.85
10	3	15	2.06133	1.89767	2.31467	11.78
11	1	0	2.123	2.09067	2.51233	10.6
11	1	1	2.13567	2.10633	2.429	8.37
11	1	2	2.078	1.934	2.36233	8.4
11	1	3	2.09333	1.95967	2.39567	6.16
11	1	4	2.06867	1.89967	2.36033	10.7
11	1	5	2.018	1.93167	2.40667	14.9
11	1	6	2.07133	1.97467	2.30067	20.94
11	1	7	1.914	1.85333	2.07667	33.64
11	1	8	2.03033	2.00933	2.069	5.35
11	1	9	1.99933	2.053	2.206	23.03
11	1	10	2.082	1.97533	2.311	25.6
11	1	11	2.00433	1.87	2.33467	45.45
11	1	12	2.12667	1.968	2.41333	22.67
11	1	13	2.15067	2.078	2.369	31.97
11	1	14	2.16233	1.96367	2.388	23.5
11	1	15	2.084	2.01467	2.348	13.96
11	2	0	2.109	1.98733	2.31433	37.54
11	2	1	2.082	1.98667	2.31333	31.23
11	2	2	2.09767	1.98467	2.37933	6.16
11	2	3	2.06867	1.91367	2.27167	11.69
11	2	4	2.08133	1.90367	2.30467	16.72
11	2	5	2.09033	1.90367	2.293	16.89
11	2	6	2.05967	2.06	2.337	15.15
11	2	7	2.002	1.98867	2.32033	72.7
11	2	8	2.05633	1.975	2.377	50.56
11	2	9	1.975	1.856	2.15433	34.9
11	2	10	2.12767	2.01167	2.386	37.34
11	2	11	2.15	2.11367	2.41467	38.33
11	2	12	2.075	2.06867	2.32367	37.71
11	2	13	2.12533	2.10067	2.38467	33.89
11	2	14	2.08833	2.12433	2.42033	23.01
11	2	15	2.08967	1.94067	2.361	11.65
11	3	0	2.122	2.03933	2.355	20.66
11	3	1	2.11867	1.969	2.257	21.38
11	3	2	2.08333	1.95333	2.347	20.84
11	3	3	2.07	2.02533	2.41833	21.43
11	3	4	2.09933	2.05067	2.368	20.87
11	3	5	2.09133	1.919	2.309	14.82
11	3	6	1.99733	2.28467	2.23133	10
11	3	7	1.99633	1.84767	2.13533	52.41
11	3	8	2.00233	1.78667	2.069	24.25
11	3	9	2.06933	1.98467	2.327	25.49
11	3	10	2.09367	2.04767	2.17833	25.73
11	3	11	2.139	2.037	2.36367	29.1
11	3	12	2.074	2.035	2.36133	30.23
11	3	13	2.131	1.916	2.344	25.4
11	3	14	2.05667	2.06633	2.38133	25.76
11	3	15	2.09567	2.006	2.30433	11.7
12	1	0	1.946	1.846	2.12567	5.56
12	1	1	1.90833	1.83433	2.134	9.02
12	1	2	1.86	1.88467	2.245	5.62
12	1	3	1.88933	1.773	2.205	4.84
12	1	4	2.01367	1.90067	2.28267	4.51
12	1	5	2.096	1.91067	2.226	14.12
12	1	6	1.96767	1.80967	2.145	7.09
12	1	7	1.937	1.77067	2.1	34.63
12	1	8	1.82267	1.777	2.06933	8.2
12	1	9	1.993	1.92833	2.05533	3.35
12	1	10	1.85233	1.78767	2.18567	9.38
12	1	11	1.86433	1.76133	2.15033	10.74
12	1	12	1.846	1.861	2.15167	4.34
12	1	13	1.927	1.852	2.26467	2.3
12	1	14	2.15133	1.84267	2.263	6.67
12	1	15	1.92567	1.905	2.217	9.5
12	2	0	2.10033	1.92467	2.17867	13.59
12	2	1	2.10433	1.83633	2.19667	7.9
12	2	2	1.90333	1.83267	2.142	5.14
12	2	3	1.837	1.814	2.20033	11.43
12	2	4	2.03667	1.88467	2.12833	8.93
12	2	5	2.05667	1.74167	2.17667	7.14
12	2	6	2.08233	1.89833	2.18933	5.55
12	2	7	1.83767	1.81333	1.91867	53.15
12	2	8	1.87767	1.84333	2.05033	40.95
12	2	9	1.91367	1.87467	2.08433	24.91
12	2	10	1.97967	1.88633	2.13233	3.91
12	2	11	1.96533	1.95667	2.16933	11.86
12	2	12	2.02	1.825	2.155	23.14
12	2	13	2.08167	1.877	2.213	13.1
12	2	14	2.11467	1.81833	2.08	6.82
12	2	15	2.08967	1.903	2.20067	13.32
12	3	0	2.06733	1.85133	2.18667	5.55
12	3	1	2.04067	1.88567	2.08467	7.69
12	3	2	1.902	1.89333	2.15267	12.94
12	3	3	1.915	1.90267	2.15133	5.26
12	3	4	2.002	1.84933	2.18867	5.98
12	3	5	1.91733	1.825	2.128	16.72
12	3	6	1.98533	1.77433	2.10833	9.28
12	3	7	1.91	1.76933	1.864	21.9
12	3	8	1.782	1.82333	1.84867	24.38
12	3	9	1.902	1.80367	2.09733	8.26
12	3	10	2.03367	1.90167	2.11367	3.16
12	3	11	2.08367	1.86967	2.2	11.68
12	3	12	2.07333	1.89633	2.20533	3.64
12	3	13	2.13367	2.107	2.286	8.78
12	3	14	2.10433	2.002	2.24667	5.56
12	3	15	2.13467	1.86533	2.11367	3.3
13	1	0	2.11167	1.88767	2.248	9.34
13	1	1	2.11033	1.898	2.28067	11.84
13	1	2	2.09867	1.84967	2.26167	8.51
13	1	3	1.89967	1.901	2.22033	4.17
13	1	4	2.08467	1.745	2.21567	5.03
13	1	5	1.918	1.78133	2.16067	6.1
13	1	6	1.866	1.89967	2.24667	7.31
13	1	7	1.75533	1.753	2.099	38.24
13	1	8	1.93567	1.74867	2.11667	24.94
13	1	9	2.12633	1.754	2.08067	26.84
13	1	10	2.08	1.91467	2.19567	4.5
13	1	11	1.968	1.952	2.18667	9.82
13	1	12	1.92467	1.873	2.09	3.32
13	1	13	1.93267	1.88833	2.19033	15.94
13	1	14	1.869	1.83067	2.281	9.62
13	1	15	1.92933	1.91	2.24567	15.67
13	2	0	1.97167	1.78867	2.14167	16.44
13	2	1	1.93233	1.87067	2.106	9.93
13	2	2	1.84333	1.95467	2.18633	6.68
13	2	3	1.89733	1.828	2.17633	10.18
13	2	4	2.055	1.86567	2.26533	13.8
13	2	5	2.09867	1.89267	2.185	17.95
13	2	6	2.12167	1.71667	2.164	11.7
13	2	7	1.80933	1.809	1.894	72.03
13	2	8	1.76967	1.81467	2.03133	45.76
13	2	9	1.95767	1.75433	2.178	29.69
13	2	10	1.943	1.78167	2.20067	22.34
13	2	11	2.13233	1.85033	2.18133	20.51
13	2	12	2.05367	1.857	2.225	12.8
13	2	13	2.02933	1.89033	2.19233	16.04
13	2	14	2.08	2.04967	2.21667	12.71
13	2	15	1.99267	2.034	2.31567	11.86
13	3	0	2.024	1.897	2.208	25.33
13	3	1	1.94733	1.86167	2.206	5.24
13	3	2	2.05233	1.855	2.17867	4.51
13	3	3	1.98867	1.84233	2.13167	5.56
13	3	4	1.91533	1.81667	2.195	5.95
13	3	5	2.155	1.94033	2.18767	6.89
13	3	6	2.03667	1.93	2.11233	5.32
13	3	7	1.908	1.77067	1.99067	23.17
13	3	8	1.73333	1.756	2.07	25.86
13	3	9	1.9	1.76733	2.21167	24.61
13	3	10	1.95667	1.91967	2.14233	27.33
13	3	11	1.905	1.88933	2.18633	15.85
13	3	12	1.87933	1.75433	2.203	11.93
13	3	13	1.983	1.91233	2.162	17.92
13	3	14	2.03667	1.854	2.05	11.74
13	3	15	1.83567	1.84933	2.185	8.32
14	1	0	1.83233	1.81467	2.20667	10.95
14	1	1	1.89333	1.806	2.275	11.74
14	1	2	1.906	1.75767	2.172	11.44
14	1	3	1.938	1.70133	2.14967	11.5
14	1	4	2.03767	1.76033	2.19633	7.6
14	1	5	2.05833	1.868	2.278	5.08
14	1	6	1.972	1.93167	2.07233	5.04
14	1	7	1.821	1.73267	1.91	49
14	1	8	1.804	1.63933	2.06933	21.12
14	1	9	1.81767	1.815	1.98667	11.45
14	1	10	1.85033	1.738	2.18133	7.79
14	1	11	1.97733	1.792	2.075	20.46
14	1	12	1.817	1.90967	2.107	9.28
14	1	13	1.95667	1.817	2.18033	11.37
14	1	14	1.94233	1.85767	2.122	8.32
14	1	15	2.04733	1.81067	2.19867	9.91
14	2	0	1.98033	1.73233	2.147	12.06
14	2	1	2.01067	1.80133	2.14233	19.65
14	2	2	2.007	1.82367	2.10833	9.31
14	2	3	2.11633	1.796	2.124	14.34
14	2	4	1.89567	1.78933	2.13633	9.93
14	2	5	2.17133	1.874	2.244	6.52
14	2	6	2.13633	1.74633	2.23	6.89
14	2	7	1.862	1.73267	2.02433	50.12
14	2	8	1.89733	1.728	2.108	44.95
14	2	9	1.909	1.823	2.00733	28.42
14	2	10	1.77433	1.834	2.06667	12.04
14	2	11	1.892	1.85533	1.951	10.63
14	2	12	1.98467	1.855	2.14733	9.32
14	2	13	2.027	1.886	2.12667	9.42
14	2	14	1.89133	1.905	2.183	9.8
14	2	15	1.92333	1.82233	2.13733	9.29
14	3	0	1.83	1.78333	2.18967	14.1
14	3	1	1.85667	1.78267	2.27967	14.29
14	3	2	1.86767	1.76633	2.17433	12.97
14	3	3	1.88133	1.76533	2.236	9.33
14	3	4	1.84133	1.80067	1.92133	3.95
14	3	5	1.84667	1.79767	2.253	14.51
14	3	6	1.91333	1.78233	2.13833	13.75
14	3	7	1.76233	1.78167	1.97033	39.71
14	3	8	1.77333	1.811	2.08267	33.99
14	3	9	1.856	1.79367	1.98633	13.38
14	3	10	1.85067	1.821	2.198	19.15
14	3	11	1.701	1.80067	2.10133	17.53
14	3	12	1.86967	1.699	1.913	19.79
14	3	13	1.85133	1.79033	2.084	23.88
14	3	14	1.87733	1.8	2.155	34.59
14	3	15	1.79433	1.76067	2.25767	23.15
15	1	0	1.83967	1.77133	2.155	7.95
15	1	1	1.84433	1.825	2.02	16.62
15	1	2	1.842	1.79867	2.131	12.42
15	1	3	1.899	1.74	2.11567	8.88
15	1	4	1.73733	1.72167	2.02833	5.89
15	1	5	1.78933	1.698	2.11467	4.17
15	1	6	1.84033	1.71567	2.10567	4.7
15	1	7	1.71067	1.57167	1.83333	47.63
15	1	8	1.78467	1.78667	1.97133	24.57
15	1	9	1.764	1.618	2.08233	11.61
15	1	10	1.78967	1.83033	1.91333	3.8
15	1	11	1.85967	1.713	2.102	4.13
15	1	12	1.85867	1.86833	2.075	6.81
15	1	13	1.884	1.747	2.11833	5.99
15	1	14	1.81967	1.72767	2.05933	7.57
15	1	15	1.86433	1.78733	2.14767	3.99
15	2	0	1.86533	1.734	2.17033	13.79
15	2	1	1.78467	1.74533	2.06467	11.03
15	2	2	1.84567	1.69533	2.11833	13.36
15	2	3	1.78733	1.86167	2.12833	12.39
15	2	4	1.76667	1.685	2.09933	10.43
15	2	5	1.876	1.85033	2.09	9.85
15	2	6	1.93467	1.73233	2.09333	6.59
15	2	7	1.73467	1.59167	1.85933	34.9
15	2	8	1.789	1.80167	1.975	41.92
15	2	9	1.76833	1.61267	2.014	22.61
15	2	10	1.78567	1.80333	2.03967	7.98
15	2	11	1.844	1.721	1.90767	14.9
15	2	12	1.85933	1.73033	2.12133	15.04
15	2	13	1.84933	1.74133	2.12333	15.58
15	2	14	1.838	1.695	2.103	16.12
15	2	15	1.87033	1.79667	2.13867	4.5
15	3	0	1.943	1.773	2.15933	9.08
15	3	1	1.96167	1.76533	2.05567	14.95
15	3	2	2.09867	1.77233	2.15867	10.66
15	3	3	2.05733	1.832	2.18067	13.79
15	3	4	1.92	1.923	2.17567	13.33
15	3	5	1.99633	1.75933	2.25	11.16
15	3	6	1.947	1.665	2.13833	12.45
15	3	7	1.8	1.60633	1.88833	72.46
15	3	8	1.72567	1.669	1.807	24.42
15	3	9	1.74067	1.665	2.081	17.1
15	3	10	1.74267	1.866	2.10933	22.3
15	3	11	1.90967	1.92833	2.24133	22.99
15	3	12	2.02633	1.80133	2.17433	19.29
15	3	13	1.88767	1.83067	2.211	20.33
15	3	14	2.01833	1.825	2.14033	7.84
15	3	15	1.87833	1.812	2.21467	5.01
16	1	0	2.05733	1.71967	2.25233	3.77
16	1	1	2.049	1.715	2.18233	5.3
16	1	2	2.01467	1.76067	2.24833	3.84
16	1	3	2.15233	1.77967	2.159	3.76
16	1	4	2.09833	1.829	2.215	4.61
16	1	5	2.13067	1.796	2.30967	2.57
16	1	6	2.04067	1.79433	2.22067	2.02
16	1	7	1.845	1.67233	2.06133	16.52
16	1	8	1.91767	1.747	2.073	8.9
16	1	9	1.914	1.81133	2.005	11.52
16	1	10	1.981	1.70767	2.045	11.67
16	1	11	1.88433	1.81867	2.25567	4.71
16	1	12	1.35467	1.78467	2.19933	2.62
16	1	13	2.104	1.809	2.14533	3.06
16	1	14	1.984	1.73333	2.267	5.42
16	1	15	1.96033	1.78567	2.20233	1.97
16	2	0	2.03767	1.93733	2.236	8.44
16	2	1	1.848	1.98833	2.15867	5.7
16	2	2	1.88	1.82133	2.252	6.01
16	2	3	1.94967	1.91467	2.16833	5.92
16	2	4	2.108	1.903	2.23333	9.79
16	2	5	2.137	1.97633	2.25233	3.9
16	2	6	2.04333	1.88967	2.19867	3.72
16	2	7	1.84233	1.79833	2.03833	22.66
16	2	8	1.935	1.71667	2.06867	24.79
16	2	9	1.86833	1.866	2.02233	24.11
16	2	10	2.07767	1.95067	2.04733	8.68
16	2	11	2.19333	2.11133	2.257	4.46
16	2	12	2.22033	1.89667	2.18967	8.78
16	2	13	2.12067	1.93867	2.156	11.48
16	2	14	2.03433	1.85433	2.25733	8.8
16	2	15	2.04567	1.85	2.213	3.32
16	3	0	2.034	1.83433	2.24267	6.17
16	3	1	2.11067	1.81267	2.179	6.13
16	3	2	2.03433	1.81833	2.29133	8.91
16	3	3	2.093	1.86233	2.414	7.03
16	3	4	2.04533	1.82567	2.45133	14.46
16	3	5	2.09	1.96967	2.29367	6.26
16	3	6	2.128	1.59267	2.29367	5.14
16	3	7	1.842	1.836	1.963	33.8
16	3	8	1.83867	1.70033	1.80167	23.03
16	3	9	1.963	1.929	1.90967	16.05
16	3	10	2.14067	1.95667	2.08433	13.12
16	3	11	2.066	1.97433	2.27	17.84
16	3	12	1.943	1.81267	2.37267	6.97
16	3	13	2.019	1.89467	2.241	8.64
16	3	14	2.05	1.83167	2.24867	7.05
16	3	15	2.07867	1.80767	2.36567	8.33

## Sheet: data2
subject	condition	time	BL (mmol/L)	RPE (6~20)
1	1	0	1.5	6
1	1	1	7.6	6
1	1	2	4.2	18
1	1	3	2	7
1	1	4	1.9	6
1	1	5	1.2	6
2	1	0	1.3	6
2	1	1	2.1	15
2	1	2	1.2	7
2	1	3	1.1	7
2	1	4	1.5	6
2	1	5	0.8	6
3	1	0	1.1	6
3	1	1	2.9	14
3	1	2	2.3	6
3	1	3	1.1	6
3	1	4	1.6	6
3	1	5	1.2	6
4	1	0	1.2	6
4	1	1	1.8	14
4	1	2	1.8	9
4	1	3	2.5	6
4	1	4	0.9	6
4	1	5	1.3	6
5	1	0	1.2	6
5	1	1	1.2	17
5	1	2	1.2	10
5	1	3	1.1	6
5	1	4	1.5	6
5	1	5	1.5	6
6	1	0	1.3	6
6	1	1	1.4	12
6	1	2	0.6	7
6	1	3	2.1	6
6	1	4	1.1	6
6	1	5	0.4	6
7	1	0	0.8	6
7	1	1	5.1	13
7	1	2	2.1	9
7	1	3	1.4	7
7	1	4	1.3	6
7	1	5	1.1	6
8	1	0	1.2	6
8	1	1	4.4	15
8	1	2	2.2	10
8	1	3	1.4	7
8	1	4	1.5	7
8	1	5	1.3	6
9	1	0	1.5	6
9	1	1	6.4	11
9	1	2	1.7	7
9	1	3	2.3	6
9	1	4	3.5	6
9	1	5	1.4	6
10	1	0	1.5	6
10	1	1	2.5	12
10	1	2	4.4	11
10	1	3	1	10
10	1	4	3.6	9
10	1	5	1.7	7
11	1	0	3.8	6
11	1	1	5.3	12
11	1	2	2.5	6
11	1	3	1.1	6
11	1	4	1.1	6
11	1	5	1.7	6
12	1	0	1.7	6
12	1	1	5.6	15
12	1	2	2.1	9
12	1	3	0.8	7
12	1	4	0.9	6
12	1	5	0.6	6
13	1	0	1.6	6
13	1	1	4.7	15
13	1	2	2.4	10
13	1	3	2.4	9
13	1	4	1.6	7
13	1	5	3	6
14	1	0	1	6
14	1	1	5	15
14	1	2	3	11
14	1	3	3	7
14	1	4	2.5	6
14	1	5	1.1	6
15	1	0	1.4	6
15	1	1	5.2	16
15	1	2	3.2	7
15	1	3	2.6	6
15	1	4	1.8	6
15	1	5	1.2	6
16	1	0	1.5	6
16	1	1	2.6	14
16	1	2	2.3	8
16	1	3	1.5	7
16	1	4	0.8	6
16	1	5	0.7	6
1	2	0	2	6
1	2	1	8.5	13
1	2	2	3.8	9
1	2	3	2.7	7
1	2	4	2.2	6
1	2	5	2.8	6
2	2	0	2	6
2	2	1	2.4	19
2	2	2	1.4	13
2	2	3	1.3	8
2	2	4	0.7	6
2	2	5	0.9	6
3	2	0	1.7	6
3	2	1	3.7	14
3	2	2	2	6
3	2	3	0.9	6
3	2	4	0.7	6
3	2	5	0.6	6
4	2	0	1.1	6
4	2	1	4.5	16
4	2	2	1.4	11
4	2	3	2	9
4	2	4	2.1	7
4	2	5	2	6
5	2	0	2	6
5	2	1	1.6	16
5	2	2	1.6	9
5	2	3	1.1	7
5	2	4	0.8	6
5	2	5	1	6
6	2	0	0.6	6
6	2	1	1.5	12
6	2	2	1.1	10
6	2	3	1.2	6
6	2	4	1	6
6	2	5	0.7	6
7	2	0	0.9	6
7	2	1	4.7	11
7	2	2	2	9
7	2	3	1.5	7
7	2	4	2	6
7	2	5	0.8	6
8	2	0	1.1	6
8	2	1	5.7	14
8	2	2	2.3	8
8	2	3	1.7	7
8	2	4	1.7	6
8	2	5	1.2	6
9	2	0	2.1	6
9	2	1	1.8	15
9	2	2	3	7
9	2	3	1.1	11
9	2	4	0.9	7
9	2	5	1.2	7
10	2	0	1.8	6
10	2	1	5.1	11
10	2	2	2.2	10
10	2	3	1.7	9
10	2	4	1.1	9
10	2	5	1.2	8
11	2	0	1.2	6
11	2	1	3	12
11	2	2	1.7	6
11	2	3	1	6
11	2	4	0.7	6
11	2	5	0.9	6
12	2	0	1.1	6
12	2	1	5.3	15
12	2	2	5.9	11
12	2	3	1	7
12	2	4	1.5	6
12	2	5	0.9	6
13	2	0	1.2	6
13	2	1	3.2	14
13	2	2	1.8	11
13	2	3	1.2	10
13	2	4	0.9	9
13	2	5	0.5	8
14	2	0	3.2	6
14	2	1	2.4	16
14	2	2	6.4	9
14	2	3	1.3	7
14	2	4	1.7	6
14	2	5	1	6
15	2	0	1.9	6
15	2	1	7	16
15	2	2	4.7	8
15	2	3	5	7
15	2	4	1.5	7
15	2	5	1.4	6
16	2	0	1	6
16	2	1	1.6	12
16	2	2	1.4	11
16	2	3	1.5	6
16	2	4	1.3	6
16	2	5	1	6
1	3	0	1.7	6
1	3	1	8.3	17
1	3	2	4	7
1	3	3	1.7	6
1	3	4	1.9	6
1	3	5	2.6	6
2	3	0	0.9	6
2	3	1	3.1	16
2	3	2	1.6	10
2	3	3	1.8	6
2	3	4	3.5	6
2	3	5	2.1	6
3	3	0	1.1	6
3	3	1	3.7	14
3	3	2	1.8	6
3	3	3	1.3	6
3	3	4	1.2	6
3	3	5	0.6	6
4	3	0	1.4	6
4	3	1	2.2	13
4	3	2	2.9	9
4	3	3	1.1	6
4	3	4	1.1	6
4	3	5	1.2	6
5	3	0	1.5	6
5	3	1	1.2	16
5	3	2	0.8	9
5	3	3	0.4	7
5	3	4	0.9	6
5	3	5	1.2	6
6	3	0	1.4	6
6	3	1	2.4	11
6	3	2	1	6
6	3	3	2.8	6
6	3	4	1.4	6
6	3	5	0.3	6
7	3	0	1.1	6
7	3	1	5.3	15
7	3	2	2.6	13
7	3	3	1.1	9
7	3	4	0.8	6
7	3	5	1.3	6
8	3	0	1	6
8	3	1	2.4	14
8	3	2	1.4	8
8	3	3	0.9	6
8	3	4	0.4	6
8	3	5	1.3	6
9	3	0	1.2	6
9	3	1	2.6	15
9	3	2	1.4	13
9	3	3	1.4	7
9	3	4	1.2	6
9	3	5	1.9	6
10	3	0	1	6
10	3	1	2.5	13
10	3	2	2.1	9
10	3	3	1	8
10	3	4	0.9	8
10	3	5	0.7	7
11	3	0	1.3	6
11	3	1	7.7	12
11	3	2	1.1	6
11	3	3	1.5	6
11	3	4	1	6
11	3	5	0.4	6
12	3	0	1.6	6
12	3	1	7.6	14
12	3	2	3.4	7
12	3	3	2.5	7
12	3	4	1.6	6
12	3	5	2.2	6
13	3	0	2.3	6
13	3	1	4.7	19
13	3	2	4.4	14
13	3	3	3.1	11
13	3	4	2.3	9
13	3	5	1.1	7
14	3	0	1.1	6
14	3	1	4.8	6
14	3	2	2.5	12
14	3	3	0.9	6
14	3	4	0.9	6
14	3	5	0.9	6
15	3	0	2.9	6
15	3	1	7.1	17
15	3	2	5.3	10
15	3	3	4.9	6
15	3	4	1.7	6
15	3	5	1.1	6
16	3	0	0.9	6
16	3	1	3.3	13
16	3	2	2.3	9
16	3	3	1.6	7
16	3	4	1.1	6
16	3	5	0.3	6
